# Supplementary material for: Synthesis of Pluronic F127 copolymer/iron oxide–GelMA nanocomposite for doxorubicin drug delivery
Source: Royal Society of Chemistry journal article supplement (doi:10.1039/d5na00776c), 2026-01-01
Supplement: d5na00776c1.pdf [file d5na00776c1.pdf]

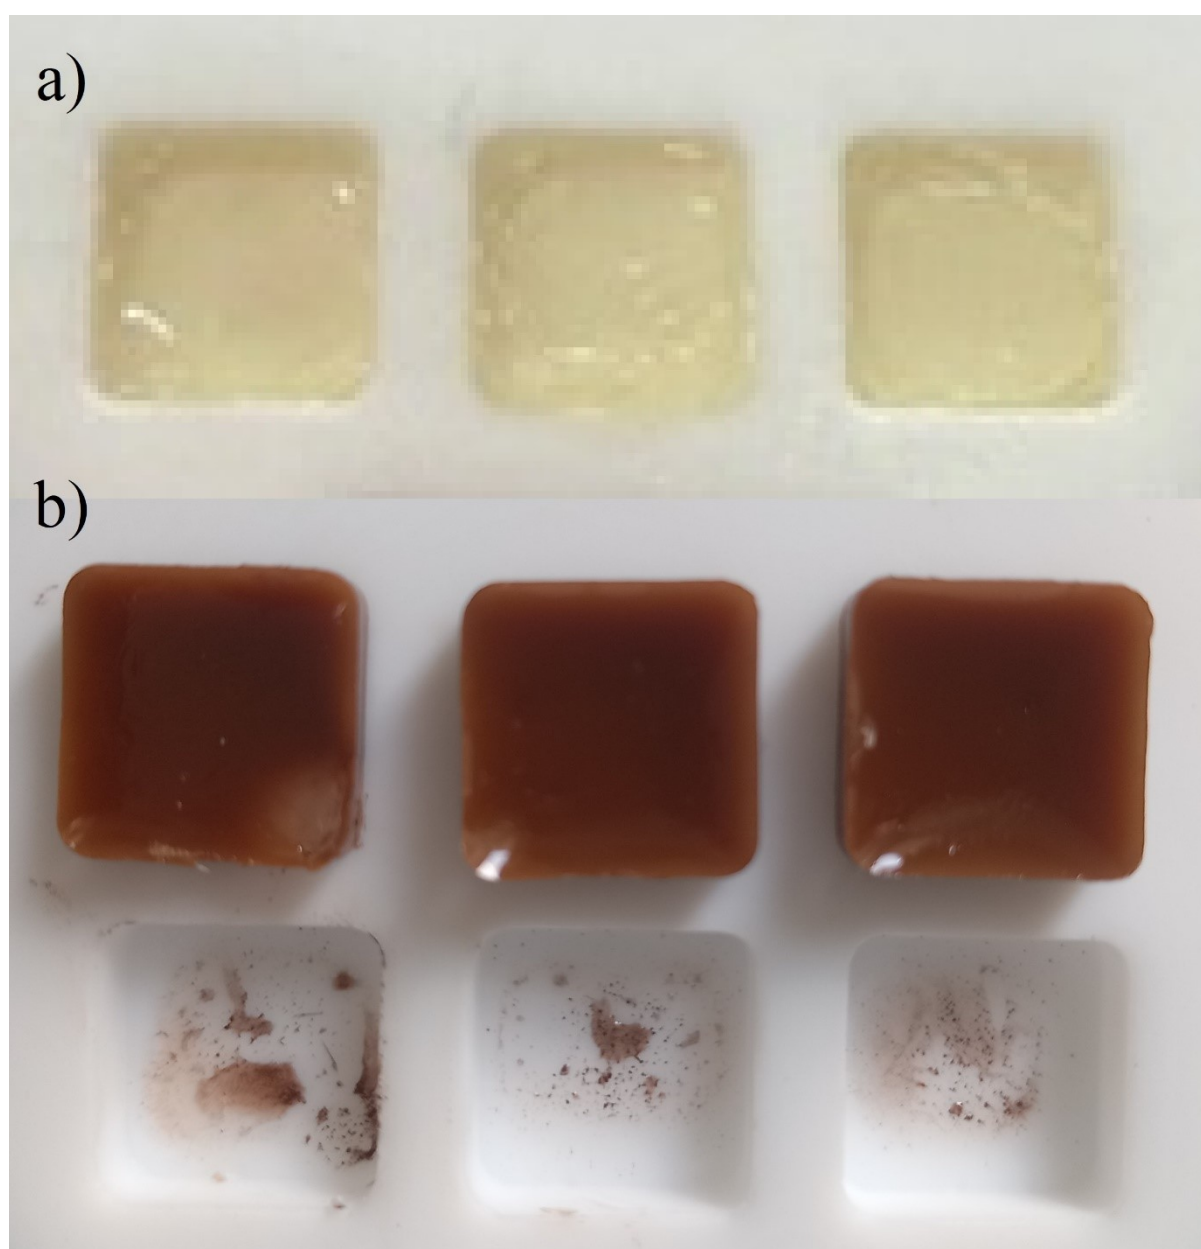

Fig. S1. Photograph representation of the mould used for GelMA hydrogel casting and the corresponding sample preparation steps: a) GelMA, and b) PF 2% MNPS-DOX

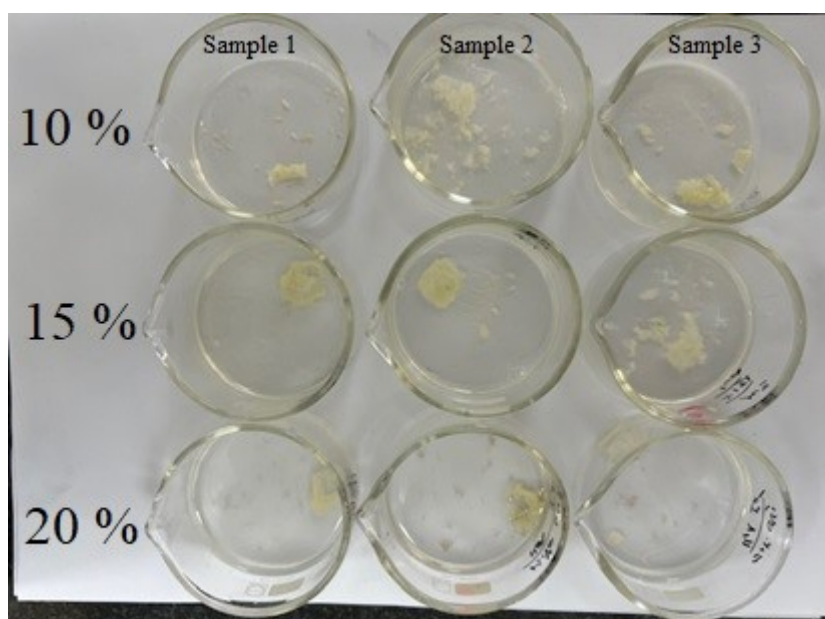

Fig. S2. Photographs of GelMA hydrogels during daily degradation in PBS at 37 °C

| GelMA (%) |          | W <sub>d</sub> (mg) | W <sub>t</sub> (gm) | W <sub>t=10</sub> (mg) | SC <sub>t</sub> (%) | SC <sub>t=10</sub> (%) | Mean $\pm$ SD <sub>t</sub> | Mean $\pm$ SD <sub>t=10</sub> |
|-----------|----------|---------------------|---------------------|------------------------|---------------------|------------------------|----------------------------|-------------------------------|
| 10        | Sample 1 | 32.47               | 102.48              | 87.26                  | 215.6               | 168.6                  | 213.2 $\pm$ 14.3           | 165.1 $\pm$ 16.6              |
|           | Sample 2 | 34.12               | 101.6               | 84.60                  | 197.8               | 147.9                  |                            |                               |
|           | Sample 3 | 30.58               | 99.75               | 85.85                  | 226.1               | 180.7                  |                            |                               |
| 15        | Sample 1 | 46.287              | 148.32              | 121.3                  | 220.3               | 161.8                  | 237.0 $\pm$ 19.0           | 165.0 $\pm$ 9.2               |
|           | Sample 2 | 42.57               | 152.12              | 117.36                 | 257.6               | 175.8                  |                            |                               |
|           | Sample 3 | 45.23               | 150.7               | 116.85                 | 233.1               | 158.3                  |                            |                               |
| 20        | Sample 1 | 88.59               | 283.48              | 235.65                 | 220.0               | 165.8                  | 218.9 $\pm$ 5.9            | 164.9 $\pm$ 3.6               |
|           | Sample 2 | 89.97               | 281.26              | 233.68                 | 212.6               | 159.7                  |                            |                               |
|           | Sample 3 | 87.25               | 282.82              | 232.98                 | 224.2               | 167.1                  |                            |                               |

Table S2. Mean  $\pm$  SD of degradation percentage of GelMA hydrogels at various concentrations (n = 3)

| GelMA (%) |          | W <sub>d</sub> (mg) | W <sub>t</sub> (gm) | Percentage of degradation (%) | Mean $\pm$ SD  |
|-----------|----------|---------------------|---------------------|-------------------------------|----------------|
| 10        | Sample 1 | 41.36               | 13.84               | 66.5                          | 63.5 $\pm$ 3.3 |
|           | Sample 2 | 41.84               | 14.86               | 64.5                          |                |
|           | Sample 3 | 39.56               | 15.93               | 59.7                          |                |
| 15        | Sample 1 | 51.73               | 15.24               | 70.5                          | 67.8 $\pm$ 2.5 |
|           | Sample 2 | 49.15               | 16.7                | 66.0                          |                |
|           | Sample 3 | 50.48               | 16.81               | 66.7                          |                |
| 20        | Sample 1 | 75.43               | 44.36               | 41.2                          | 39.6 $\pm$ 1.4 |
|           | Sample 2 | 76.29               | 46.87               | 38.5                          |                |
|           | Sample 3 | 76.84               | 46.68               | 39.2                          |                |

Table S3. Mean  $\pm$  SD of drug entrapment efficiency of PF-MNPs at various concentrations (n = 3)

| PF-MNPs (%) |          | W <sub>DOX</sub> (mg) | W <sub>Source</sub> (gm) | EE (%)            | DLE (%)          |
|-------------|----------|-----------------------|--------------------------|-------------------|------------------|
| 1           | Sample 1 | 0.0585                | 0.1043                   | 43.61 $\pm$ 0.251 | 1.52 $\pm$ 0.009 |
|             | Sample 2 | 0.0588                | 0.1043                   |                   |                  |
|             | Sample 3 | 0.0591                | 0.1043                   |                   |                  |
| 2           | Sample 1 | 0.0264                | 0.1043                   | 74.73 $\pm$ 0.549 | 2.60 $\pm$ 0.019 |
|             | Sample 2 | 0.0257                | 0.1043                   |                   |                  |
|             | Sample 3 | 0.0269                | 0.1043                   |                   |                  |
| 5           | Sample 1 | 0.0456                | 0.1043                   | 74.73 $\pm$ 0.549 | 1.94 $\pm$ 0.022 |
|             | Sample 2 | 0.0468                | 0.1043                   |                   |                  |
|             | Sample 3 | 0.0457                | 0.1043                   |                   |                  |
